# Supplementary material for: Role of Ion Channels in the Maintenance of Sperm Motility and Swimming Behavior in a Marine Teleost
Source: MDPI journal article supplement (doi:10.3390/ijms232012113), 2022-10-11
Supplement: s1 [file s1]

**Table S1.** Primary and secondary antibodies employed in this study.

| Antibody           | Host species | Vendor            | Catalog no. | Antigen <sup>a</sup> | % Identity <sup>b</sup> | Dilution <sup>c</sup> |        | Antigen retrieval <sup>f</sup> |
|--------------------|--------------|-------------------|-------------|----------------------|-------------------------|-----------------------|--------|--------------------------------|
|                    |              |                   |             |                      |                         | IB                    | IF     |                                |
| PIEZO 1            | Rabbit       | Proteintech       | 15939-1-AP  | Human 67-373 aa      | 56                      | 1:250 <sup>d</sup>    | 1:200  | TE pH 9, 0.2% Triton X-100     |
| TRPV1              | Rabbit       | Antibodies-online | ABIN351235  | N/A                  | N/A                     | 1:500 <sup>d</sup>    | 1:400  | 0.2% Triton X-100              |
| TRPV4              | Rabbit       | Novus Biologicals | NBP2-41262  | Human 380-430 aa     | 78                      | 1:500 <sup>d</sup>    | 1:400  | 0.2% Triton X-100              |
| TRPV6              | Rabbit       | Merck             | SAB2106366  | Mouse 838-987 aa     | 65                      | 1:250 <sup>d</sup>    | 1:400  | 0.2% Triton X-100              |
| CACNA1G            | Rabbit       | GeneTex           | GTX60133    | Human 889-939 aa     | 96                      | 1:250 <sup>e</sup>    | 1:200  | Citrate pH 6                   |
| KCNH6              | Rabbit       | Merck             | AV35480     | Human 1779-1928 aa   | 84                      | 1:250 <sup>d</sup>    | 1:200  | Citrate pH 6                   |
| SCN (Pan antibody) | Mouse        | Merck             | S8809       | Human 4979-5032 aa   | 100                     | 1:200 <sup>e</sup>    | 1:100  | TE pH 9, 0.2% Triton X-100     |
| LRRC8D             | Rabbit       | Proteintech       | 11537-1-AP  | Human 515-858 aa     | 93                      | 1:500 <sup>d</sup>    | 1:200  | TE pH 9, 0.2% Triton X-100     |
| $\alpha$ -Tubulin  | Mouse        | Merck             | T9026       | Chicken microtubules | N/A                     | 1:25000 <sup>d</sup>  | -      | -                              |
| Rabbit IgG HRP     | Goat         | Bio-Rad           | 172-1019    | -                    | -                       | 1:5000 <sup>d</sup>   | -      | -                              |
| Mouse IgG HRP      | Goat         | Bio-Rad           | 172-1011    | -                    | -                       | 1:5000 <sup>d</sup>   | -      | -                              |
| Rabbit IgG Cy3     | Sheep        | Merck             | C2306       | -                    | -                       | -                     | 1:1000 | -                              |

<sup>a</sup> Exact amino acid sequence of the mammalian ortholog used for the synthetic peptide employed for immunization, or amino acid region where the peptide was located (as available from the vendor).

<sup>b</sup> Percentage of identity of the immunization peptide or amino acid region with the seabream ortholog.

<sup>c</sup> IB: immunoblotting; IF: immunofluorescence microscopy.

<sup>d</sup> Blocking in 5% milk.

<sup>e</sup> Blocking in 3% BSA.

<sup>f</sup> Buffer employed for antigen retrieval prior to immunostaining.

**Table S2.** Nucleotide sequences of the primers employed for RT-PCR analysis of ion channel expression in seabream spermatozoa.

| GenBank accession | Transcript symbol | Forward sequence      | Reverse sequence      |
|-------------------|-------------------|-----------------------|-----------------------|
| XM_030441522      | <i>piezo1</i>     | TGAGATCTCCCACTCCATCA  | CCCCAAGACATCTTTGCAGT  |
| XM_030400112      | <i>trpm4</i>      | GGCTTTGGAGAGTGAGATGG  | GGTAACTGAGTCCAGCGATGA |
| XM_030438142      | <i>trpv1</i>      | GGAGAAGAGACTGGGCACTG  | CGTAGGTTTGAATGCCTCGT  |
| XM_030415727      | <i>trpv4</i>      | AGGGTGGATGAGGTGAACTG  | TATCAGTGTCTGGGCGTCAG  |
| XM_030393613      | <i>trpv6</i>      | GACAGAAACGACCCGATGTT  | TTCAAATGTTTACGCCTCAG  |
| XM_030399309      | <i>cacna1g</i>    | GAGCCTCAGTCTGGCCTCTA  | TTTGTGTGTGTGGAGGGTTC  |
| XM_030422644      | <i>kcnc4</i>      | CAAATGTGGCCCTTTCAGAG  | CTGCACAGCGTCTACTCCAC  |
| XM_030401465      | <i>kcnh6</i>      | GGTCACCCCTGAAACTGAGA  | ACCTGAATCGCAGATTGGTC  |
| XM_030411011      | <i>scn1b</i>      | CCGAGGTCATGATGTACGTG  | TCCAGTTGTTGTCGAGGAGA  |
| XM_030403786      | <i>lrrc8d</i>     | G TTCAGATGCACCAAGCTCA | TAAAGGGTGCGTTGCTCTCT  |
