# Supplementary material for: Role of Ion Channels in the Maintenance of Sperm Motility and Swimming Behavior in a Marine Teleost
Source: MDPI journal article supplement (doi:10.3390/ijms232012113), 2022-10-11
Supplement: s1 [file s1]

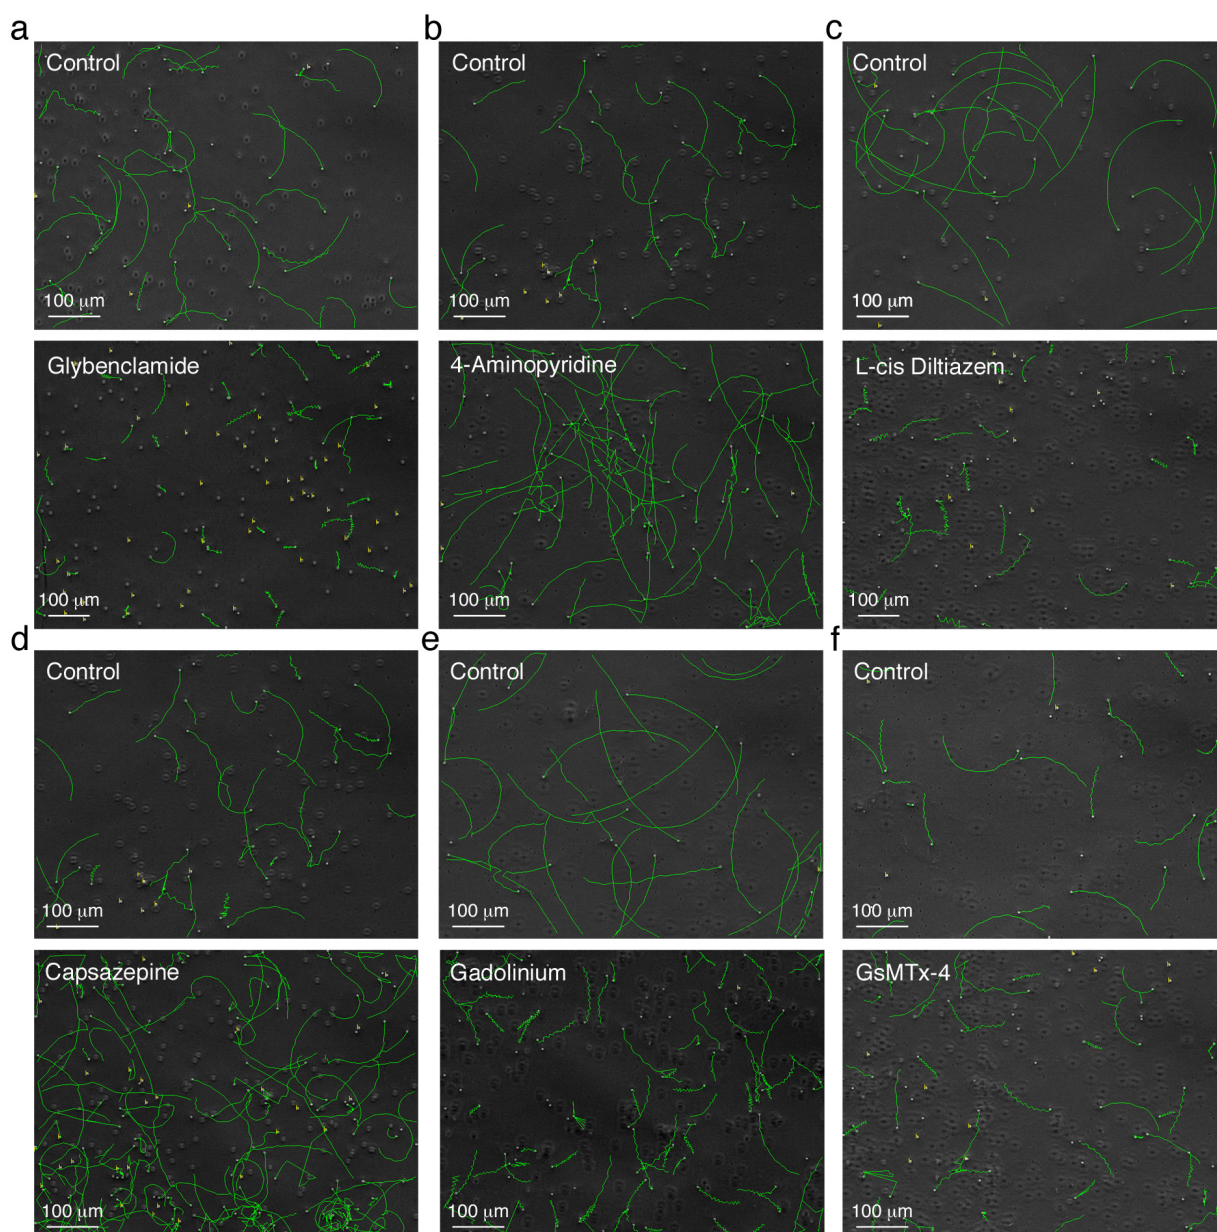

**Figure S1.** Representative sperm trajectories tracked at 25 frames per second in the presence of different ion channel blockers analyzed with ISAS®v1 CASA. The different types of motility are shown as trajectories of green color on the captured video sequences.

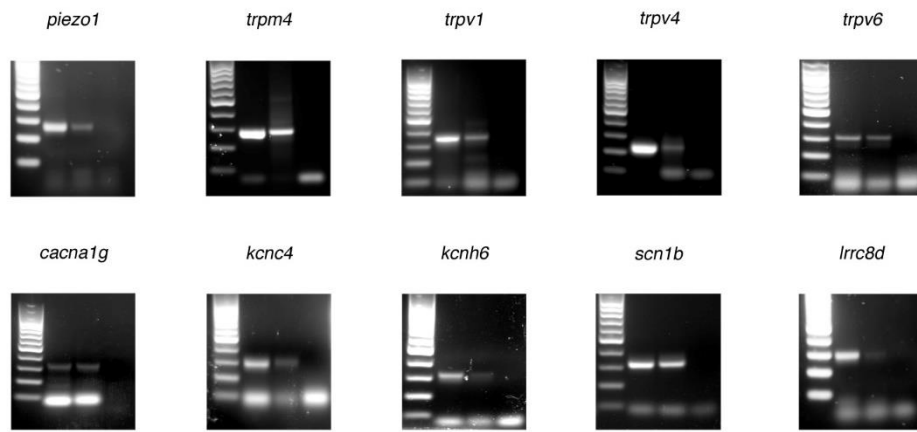

**Figure S2.** Uncropped RT-PCR gels shown in Figure 5c.

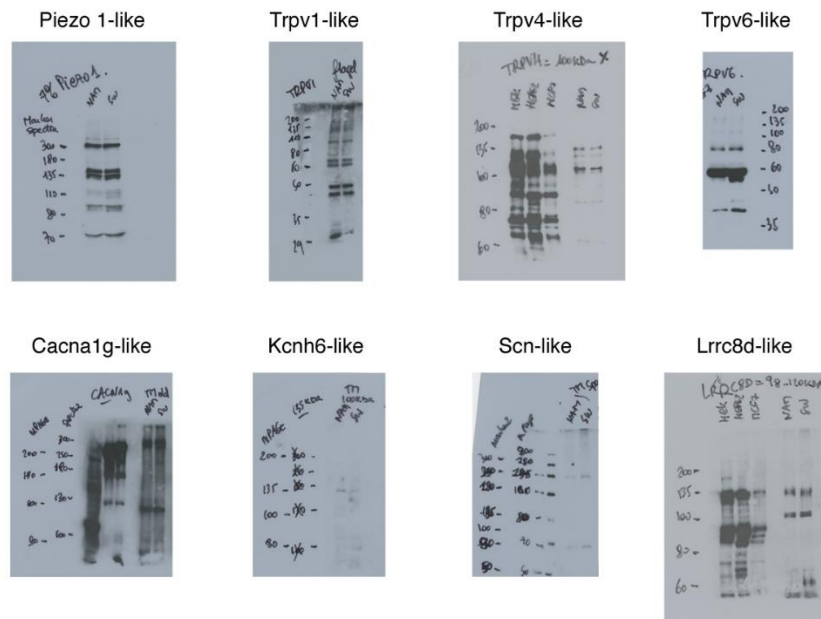

**Figure S3.** Uncropped immunoblots shown in Figure 6 (upper panels).
