# Supplementary material for: Role of Ion Channels in the Maintenance of Sperm Motility and Swimming Behavior in a Marine Teleost
Source: Int J Mol Sci. 2022 Oct 11;23(20):12113. doi: 10.3390/ijms232012113 (PMC9603624; doi:10.3390/ijms232012113)
Supplement: Supplementary file 1 [file ijms-23-12113-s001.zip]

Archive with 4 entries (4 files):
- Spreadsheet S1.xlsx
- Spreadsheet S2.xlsx
- Supp Figures.pdf
- Supp Tables S1-S2.pdf
