# Supplementary material for: Role of Ion Channels in the Maintenance of Sperm Motility and Swimming Behavior in a Marine Teleost
Source: Int J Mol Sci. 2022 Oct 11;23(20):12113. doi: 10.3390/ijms232012113 (PMC9603624; doi:10.3390/ijms232012113)
Supplement: Supplementary file 1 [file ijms-23-12113-s001.zip › Spreadsheet S1.xlsx]

## Sheet: Spreadsheet S1
Transcripts encoding ion channels in seabream ejaculated spermatozoa determined by RNA-seq
Family	Abbreviation	ID	Gene name	Subcellular Location (1)	AD3915	AD3919	AD3920	AD3921	AD3924	MEAN	SEM
Acid-sensing ion channels	ASIC	Saurata1B016122	acid-sensing ion channel 1 isoform X1	PM	0	0.05	0.37	0.07	0.04	0.106	0.0669776
		Saurata1B029082	acid-sensing ion channel 1-like	PM	0	0.17	0	0	0.27	0.088	0.0561605
		Saurata1B052394	acid-sensing ion channel 2 isoform X1	PM	6.92	3.6	3.4	4.06	2.67	4.13	0.732612
		Saurata1B053127	acid-sensing ion channel 2 isoform X2	PM	0.09	4	0.28	0.54	1.17	1.216	0.719504
		Saurata1B032338	acid-sensing ion channel 3 isoform X4	PM	0	0.08	0.11	0.1	0.48	0.154	0.0837616
		Saurata1B025801	acid-sensing ion channel 4	PM	0	4.21	0.12	0.8	0.83	1.192	0.773404
ATP-binding cassette transporter	ABC transporters	Saurata1B000462	canalicular multispecific organic anion transporter 2 isoform X2	Lysosome, endosome	1.32	1.5	0.37	0.03	0.06	0.656	0.314811
Calcium- and sodium-activated potassium channels	CaNaK	Saurata1B049555	calcium-activated potassium channel subunit alpha-1 isoform X20	PM	0	0	0	0.27	0.1	0.074	0.0526878
		Saurata1B040378	calcium-activated potassium channel subunit alpha-1 isoform X6	PM	0.02	0.01	0	0.02	0.34	0.078	0.0656049
		Saurata1B022929	calcium-activated potassium channel subunit beta-2-like	PM	0	0.12	0	0	0	0.024	0.024
		Saurata1B034183	calcium-activated potassium channel subunit beta-3-like	PM	0	0.14	0	0.17	0	0.062	0.0382623
		Saurata1B000808	calcium-activated potassium channel subunit beta-4	PM	0	0	0.15	0	0	0.03	0.03
		Saurata1B024802	intermediate conductance calcium-activated potassium channel 4	PM	3.74	1.14	0.78	1.26	0.87	1.558	0.552417
		Saurata1B035967	potassium channel subfamily T member 1-like isoform X3	PM	0.33	3.15	1.29	1.83	1.65	1.65	0.455763
		Saurata1B041771	potassium channel subfamily T member 2-like	PM	0	0.07	0	0.05	0.06	0.036	0.0150333
		Saurata1B033404	potassium channel subfamily T member 2-like isoform X1	PM	0.07	0	0.12	0	0	0.038	0.0245764
		Saurata1B015396	small conductance calcium-activated potassium channel 1	PM	0.06	2.41	0.27	0.16	0.42	0.664	0.440575
		Saurata1B055091	small conductance calcium-activated potassium channel 1-like	PM	0.59	2.17	3.65	0.79	6.5	2.74	1.08894
		Saurata1B037177	small conductance calcium-activated potassium channel 2 isoform X2	PM	0.21	1.14	1.97	0.31	1.73	1.072	0.358307
		Saurata1B056962	small conductance calcium-activated potassium channel 2-like	PM	1.34	2.04	0.16	0.43	0.17	0.828	0.372067
		Saurata1B030497	small conductance calcium-activated potassium channel 2-like isoform X2	PM	0.6	0.6	0.95	0.07	1.61	0.766	0.253547
Chloride intracellular channels	CLIC	Saurata1B034424	chloride intracellular channel 1	PM, NM	49.33	19.97	15.88	18.3	15.63	23.822	6.42718
		Saurata1B051983	chloride intracellular channel 5-like isoform X1	PM, NM	0.11	0.31	0.13	0.34	0.4	0.258	0.058258
		Saurata1B029277	chloride intracellular channel protein 4	PM, NM	49.34	24.66	25.67	19.61	28.76	29.608	5.14792
ClC family channels	CIC	Saurata1B010514	H(+) Cl(-) exchange transporter 5 isoform X1	PM, Golgi, Endosome	2.95	1.77	0.76	1.23	1.3	1.602	0.373087
		Saurata1B012747	H(+) Cl(-) exchange transporter 7 isoform X1	PM, Golgi, Endosome	25.79	10.97	7.41	6.32	12.46	12.59	3.48588
		Saurata1B054711	chloride channel 1	Lysosome	0.12	0.21	0.33	0.06	0.57	0.258	0.0902995
		Saurata1B025647	chloride channel 1-like	Lysosome	0.25	0.07	0.41	0.24	0.36	0.266	0.0587026
		Saurata1B057106	chloride channel 2 isoform X2	PM	0.9	0.34	0.64	2.17	1.21	1.052	0.31422
		Saurata1B047444	chloride channel 2-like isoform X4	PM	0.02	0.1	0.04	0.09	0.23	0.096	0.0366879
		Saurata1B043031	chloride channel CIC-Ka	PM	0	0	0.29	0	0	0.058	0.058
Cyclic nucleotide-regulated channels	CNG	Saurata1B041465	cGMP-gated cation channel alpha-1	PM	0.52	0.96	1.2	0.66	0.82	0.832	0.118085
		Saurata1B013693	cyclic nucleotide-gated cation channel alpha-3	PM	0.86	0.18	0.2	0	0.44	0.336	0.148513
		Saurata1B022662	Cyclic nucleotide-gated cation channel alpha-4	PM	0	0.07	0	0.34	0.15	0.112	0.0633561
		Saurata1B009571	cyclic nucleotide-gated cation channel beta-1-like	PM	0.04	0.1	0.16	0.14	0.22	0.132	0.0300666
		Saurata1B017890	cyclic nucleotide-gated cation channel beta-3-like	PM	0	6.45	0	0	0	1.29	1.29
		Saurata1B033928	cyclic nucleotide-gated cation channel-like	PM	0.03	1.52	0	0.55	0.44	0.508	0.275416
		Saurata1B033217	cyclic nucleotide-gated channel rod photoreceptor subunit alpha-like	PM	0	0.27	0.04	0.31	0.04	0.132	0.0652227
		Saurata1B049961	cyclic nucleotide-gated olfactory channel	PM	0.19	0.58	0.19	0.65	0.42	0.406	0.0957392
		Saurata1B000935	potassium sodium hyperpolarization-activated cyclic nucleotide-gated channel 1-like	PM	0	0.55	0.04	0.2	0.36	0.23	0.102274
		Saurata1B055687	potassium sodium hyperpolarization-activated cyclic nucleotide-gated channel 2-like	PM	0.37	1.57	1.27	0.82	1.56	1.118	0.231417
		Saurata1B009916	potassium sodium hyperpolarization-activated cyclic nucleotide-gated channel 3-like	PM	0.43	0.99	0.09	0.77	0.41	0.538	0.156026
		Saurata1B056443	potassium sodium hyperpolarization-activated cyclic nucleotide-gated channel 4	PM	0	0.27	0	0.12	0	0.078	0.0533292
Cyclin and CBS domain divalent metal cation transport mediators	CNNM	Saurata1B044515	metal transporter CNNM2	PM	21.57	10.51	7.36	4.39	7.86	10.338	2.97132
		Saurata1B038260	metal transporter CNNM3 isoform X1	PM	6.1	4.17	4.31	2.71	4.05	4.268	0.540485
		Saurata1B025731	metal transporter CNNM4-like isoform X1	PM	1.3	0.63	0.28	1	0.42	0.726	0.187926
Inward rectifier potassium channels	Kir	Saurata1B034699	ATP-sensitive inward rectifier potassium channel 1	PM	0	1.22	0.08	0.14	0.76	0.44	0.237065
		Saurata1B029144	ATP-sensitive inward rectifier potassium channel 10	PM	0.35	0.11	0	0.1	0.88	0.288	0.158789
		Saurata1B010902	ATP-sensitive inward rectifier potassium channel 11	PM	0.05	0.85	0.09	0.24	0.96	0.438	0.194046
		Saurata1B012415	ATP-sensitive inward rectifier potassium channel 11	PM	0	0.35	0.11	0.55	0.52	0.306	0.109389
		Saurata1B039844	ATP-sensitive inward rectifier potassium channel 12	PM	0	1.21	0.13	0.06	0.98	0.476	0.256137
		Saurata1B052503	ATP-sensitive inward rectifier potassium channel 15	PM	0	1.12	0	0.25	0.66	0.406	0.215444
		Saurata1B028622	ATP-sensitive inward rectifier potassium channel 8	PM	12.39	4.84	0.81	0.4	0.92	3.872	2.27638
		Saurata1B025463	G -activated inward rectifier potassium channel 1	PM	0.05	0.64	0.05	0.05	0.56	0.27	0.135314
		Saurata1B015823	G -activated inward rectifier potassium channel 1-like	PM	0	0.56	0.8	0.46	0.59	0.482	0.132605
		Saurata1B021755	G -activated inward rectifier potassium channel 1-like	PM	0	0.36	0	0.1	0.12	0.116	0.0658483
		Saurata1B026401	G -activated inward rectifier potassium channel 2	PM	0.31	1.38	0.12	0.31	0.48	0.52	0.222419
		Saurata1B013274	G -activated inward rectifier potassium channel 3-like	PM	0	1.41	0	0	0.11	0.304	0.277319
		Saurata1B014249	G -activated inward rectifier potassium channel 3-like	PM	0	0.3	0	0.04	0.05	0.078	0.0564269
		Saurata1B048118	G -activated inward rectifier potassium channel 3-like	PM	0	0.16	0.05	0.04	1.22	0.294	0.233015
		Saurata1B015655	G -activated inward rectifier potassium channel 4	PM	9.29	6.17	3.04	3.88	3.81	5.238	1.14022
		Saurata1B050277	inward rectifier potassium channel 13	PM	0	0.17	0	0.59	0.87	0.326	0.173568
		Saurata1B030581	inward rectifier potassium channel 2-like	PM	0.43	0.85	0.18	0.44	0.64	0.508	0.112401
Orai channels	Orai	Saurata1B011862	calcium release-activated calcium channel 1	PM	9.42	8.34	7.92	5.25	16.51	9.488	1.88481
Piezo channels	PIEZO	Saurata1B009589	piezo-type mechanosensitive ion channel component 1	PM, ER	8.55	7.46	6.94	2.42	2.87	5.648	1.25522
		Saurata1B001369	piezo-type mechanosensitive ion channel component 2 isoform X2	PM	1.23	0.79	0.84	0.29	0.76	0.782	0.149446
		Saurata1B056368	piezo-type mechanosensitive ion channel component 2-like	PM	0.01	0.83	0.26	0.18	0.89	0.434	0.17879
P-type ATPase	P-type ATPases	Saurata1B007607	calcium-transporting ATPase type 2C member 1	Golgi	3.53	1.15	1.26	0.87	2.08	1.778	0.482073
		Saurata1B021915	copper-transporting ATPase 1	PM, ER, golgi	12.55	8.41	6.35	6.05	9.07	8.486	1.16961
		Saurata1B051014	copper-transporting ATPase 2	Golgi, endosome, MM	0	0	0	0	0.16	0.032	0.032
		Saurata1B028557	manganese-transporting ATPase 13A1	ER	8.09	3.96	6.21	3.85	6.89	5.8	0.830313
		Saurata1B013276	plasma membrane calcium-transporting ATPase 1	PM	3.19	1.67	1.77	2.03	0.86	1.904	0.376319
		Saurata1B054084	plasma membrane calcium-transporting ATPase 1-like	PM	1.04	0.47	2.97	0.88	3.59	1.79	0.623113
		Saurata1B036455	plasma membrane calcium-transporting ATPase 2	PM	0.01	0.01	0.05	0	0.03	0.02	0.00894427
		Saurata1B054142	plasma membrane calcium-transporting ATPase 3	PM	0	0.07	0	0	0	0.014	0.014
		Saurata1B028296	plasma membrane calcium-transporting ATPase 3-like	PM	0	0	0	0	0	0	0
		Saurata1B046189	potassium-transporting ATPase alpha chain 1	PM	0.08	0	0	0	0.09	0.034	0.0208806
		Saurata1B011401	potassium-transporting ATPase subunit beta	PM	0	0	0	0	0	0	0
		Saurata1B050032	probable cation-transporting ATPase 13A2	Lysosome	19.46	8.33	5.78	5.75	9.32	9.728	2.53223
		Saurata1B045322	probable cation-transporting ATPase 13A3	Lysosome	8.74	6.05	5.53	4.56	8.18	6.612	0.796376
		Saurata1B010482	probable cation-transporting ATPase 13A3 isoform	Lysosome	0.49	0	0.43	0.1	0	0.204	0.106518
		Saurata1B035554	sodium potassium-transporting ATPase subunit alpha-2-like	PM	0.06	0.17	0.15	0.57	0.07	0.204	0.094
		Saurata1B021811	sodium potassium-transporting ATPase subunit alpha-3	PM	3.84	1.42	2.04	2.47	1.02	2.158	0.48888
		Saurata1B014981	sodium potassium-transporting ATPase subunit beta-1	PM	277.42	142.14	107.75	91.49	120.81	147.922	33.419
		Saurata1B031475	sodium potassium-transporting ATPase subunit beta-2-like	PM	0.24	2.82	0.74	0	2.71	1.302	0.609331
		Saurata1B056249	sodium potassium-transporting ATPase subunit beta-3	PM	0.19	0.07	0.21	0	1.12	0.318	0.204191
		Saurata1B036496	sodium potassium-transporting ATPase subunit beta-3-like	PM	0	0.86	0	0.96	1.3	0.624	0.264983
		Saurata1B045405	cation-transporting ATPase 13A2 isoform X2	Lysosome, endosome	18.28	8.03	5.96	5.03	8.37	9.134	2.37033
SLC20 family of sodium-dependent phosphate transporters	SLC20	Saurata1B020685	sodium-dependent phosphate transporter 1-A-like	PM	0.3	0.73	0.52	0.14	0.08	0.354	0.120979
		Saurata1B018145	sodium-dependent phosphate transporter 1-B-like	PM	20.06	13.8	10.13	15.03	18.18	15.44	1.73069
		Saurata1B001504	sodium-dependent phosphate transporter 2 isoform X1	PM	0	0.15	0.15	0.07	0.35	0.144	0.0586174
SLC24 family of sodium/potassium/calcium exchangers	SLC24	Saurata1B022623	sodium potassium calcium exchanger 1	PM	0.3	0.41	0.05	0.11	0.45	0.264	0.079599
		Saurata1B029708	sodium potassium calcium exchanger 1-like isoform X1	PM	0	0.54	0.08	0.15	0.14	0.182	0.0934024
		Saurata1B017804	sodium potassium calcium exchanger 2 isoform X1	PM	0	0.19	0	0.04	0.26	0.098	0.0535164
		Saurata1B033916	sodium potassium calcium exchanger 2-like	PM	0	0.85	50.73	0.02	139.39	38.198	27.1186
		Saurata1B009835	sodium potassium calcium exchanger 3-like	PM	2.29	1.33	1.29	1.43	0.85	1.438	0.235083
		Saurata1B038308	sodium potassium calcium exchanger 5	PM	0	0.09	0	0	0.07	0.032	0.0198494
SLC26 family of anion exchangers	SLC26	Saurata1B016984	Chloride anion exchanger	PM	0.26	0.16	0.04	0.42	0.79	0.334	0.129908
		Saurata1B034760	chloride anion exchanger-like	PM	0	0	0	0	0	0	0
		Saurata1B038186	chloride anion exchanger-like	PM	0	0	0.58	0	0	0.116	0.116
SLC4 family of bicarbonate transporters	SLC4	Saurata1B019887	anion exchange 2 isoform X1	PM	5.23	5.25	3.91	2.51	4.99	4.378	0.527697
		Saurata1B006876	anion exchange 2-like	PM	0	0.15	0	0.03	0.16	0.068	0.0359722
		Saurata1B036803	anion exchange 3-like isoform X1	PM	4.28	1.92	4.09	6.74	3.31	4.068	0.786558
		Saurata1B030325	anion exchange 3-like isoform X2	PM	6.99	5.56	13.98	15.46	8.54	10.106	1.95578
		Saurata1B048137	band 3 anion exchange -like	PM	0.8	0.99	0.35	0.64	0.56	0.668	0.108324
		Saurata1B026873	Electrogenic sodium bicarbonate cotransporter 1	PM	0	0	0.99	0	0	0.198	0.198
		Saurata1B006223	electrogenic sodium bicarbonate cotransporter 1-like	PM	0.45	0.3	1.24	0.14	2.89	1.004	0.508022
		Saurata1B016128	electrogenic sodium bicarbonate cotransporter 1-like isoform X2	PM	0	0.06	0	0	0.1	0.032	0.0205913
		Saurata1B001582	electrogenic sodium bicarbonate cotransporter 4-like	PM	0.87	0.16	0	0	1.26	0.458	0.257029
		Saurata1B035411	electrogenic sodium bicarbonate cotransporter 4-like isoform X1	PM	0	0.64	0	0	0.82	0.292	0.181064
		Saurata1B029023	Electroneutral sodium bicarbonate exchanger 1	PM	0	0	0.34	0	0.55	0.178	0.113947
		Saurata1B020541	sodium bicarbonate cotransporter 3-like isoform X1	PM	6.57	3.95	4.73	4.45	3.23	4.586	0.557616
		Saurata1B033452	sodium bicarbonate cotransporter 3-like isoform X2	PM	6.34	2.75	4.42	4.41	2.17	4.018	0.732458
		Saurata1B026472	sodium bicarbonate cotransporter 3-like isoform X7	PM	3.25	2.75	1.95	3.62	2.29	2.772	0.304637
		Saurata1B017597	sodium bicarbonate transporter 11 isoform X2	PM	20.38	10.29	13.56	11.77	12.43	13.686	1.75509
SLC5 family of sodium-dependent glucose transporters	SLC5	Saurata1B038576	sodium iodide cotransporter	PM	0	0	0.88	0	1.47	0.47	0.302556
Putative sugar transporters	SLC45	Saurata1B001671	solute carrier family 45 member 2	PM, vesicle	4.98	6.88	1.5	1.14	6.03	4.106	1.1779
SLC55 Mitochondrial cation/proton exchangers	SLC55	Saurata1B005804	mitochondrial proton calcium exchanger isoform X4	MM	5.55	4.25	2.19	4.74	2.21	3.788	0.680738
		Saurata1B028668	mitochondrial sodium hydrogen exchanger 9B2-like	MM	3.27	2.32	1.09	1.29	1.87	1.968	0.391106
		Saurata1B014382	mitochondrial sodium hydrogen exchanger 9B2-like isoform X1	MM	4.99	7.81	3.07	2.03	5.07	4.594	0.990523
SLC58 MagT-like magnesium transporter family	SLC58	Saurata1B038883	magnesium transporter 1	PM, ER	85.78	32.96	38.42	26.49	58.67	48.464	10.7721
		Saurata1B030920	magnesium transporter MRS2 homolog	MM	5.99	2.37	3.09	0.2	2.72	2.874	0.926934
		Saurata1B006914	magnesium transporter NIPA2-like	PM, endosome	28.22	16.14	15.09	9.51	16.76	17.144	3.0523
		Saurata1B017152	magnesium transporter NIPA2	PM, endosome	10.81	5.24	5.49	6.25	8.28	7.214	1.0456
SLC61 Molybdate transporter family	SLC61	Saurata1B000502	molybdate-anion transporter	PM	11.16	5.57	4.1	4.57	11.98	7.476	1.69312
SLC8 family of sodium/calcium exchangers	SLC8	Saurata1B038442	sodium calcium exchanger 1 isoform X1	PM	13.41	3.07	2.77	4.49	5.25	5.798	1.95658
		Saurata1B004925	sodium calcium exchanger 1-like	PM	0	0.33	0.04	0.67	0.66	0.34	0.144395
		Saurata1B019967	sodium calcium exchanger 2-like	PM	0	0	0	0	0	0	0
		Saurata1B031118	sodium calcium exchanger 2-like isoform X1	PM	0.02	0.07	0	0.12	0.06	0.054	0.0208806
		Saurata1B034666	sodium calcium exchanger 2-like isoform X3	PM	0.12	8.98	0.13	0.57	1.52	2.264	1.69821
		Saurata1B020176	sodium calcium exchanger 3 isoform X1	PM	0.57	0.69	1	2.11	0.98	1.07	0.272855
SLC9 family of sodium/hydrogen exchangers	SLC9	Saurata1B019112	Na(+) H(+) exchanger beta-like isoform X1	PM, MM, endosome	12.82	8.39	4.18	5.39	5.97	7.35	1.52966
		Saurata1B028710	Sodium hydrogen exchanger 6	Endosome	2.39	2.6	1.64	1.74	1.81	2.036	0.192213
		Saurata1B018062	sodium hydrogen exchanger 6-like	Endosome	12.28	6.97	4.78	4.8	4.51	6.668	1.47134
		Saurata1B015453	sodium hydrogen exchanger 7 isoform X2	PM, endosome, Golgi	0.54	0	0	0	0	0.108	0.108
		Saurata1B025443	sodium hydrogen exchanger 8	Golgi	17.28	8.31	7.49	5.24	9.89	9.642	2.05163
Sodium leak channels non-selective	NALCN	Saurata1B054278	sodium leak channel non-selective isoform X1	PM	0.08	0.18	0.39	0.98	0.91	0.508	0.185618
Transient Receptor Potential channels	TRP	Saurata1B049070	short transient receptor potential channel 1	PM	0.17	0.22	0.12	0.04	0.6	0.23	0.0971597
		Saurata1B032720	short transient receptor potential channel 2-like	PM	0	0.35	0.2	0.25	0.03	0.166	0.0663777
		Saurata1B017238	short transient receptor potential channel 4-like	PM	0	0.4	0	0.11	0.18	0.138	0.0739189
		Saurata1B023728	short transient receptor potential channel 5-like	PM	0	0	0	0.58	0.72	0.26	0.160748
		Saurata1B009232	short transient receptor potential channel 6	PM	0.29	0.16	0	0.44	0.7	0.318	0.119933
		Saurata1B020142	short transient receptor potential channel 6-like	PM	0.07	0.09	0.2	0.66	0.61	0.326	0.12832
		Saurata1B046857	short transient receptor potential channel 7 isoform X1	PM	0	0.14	0.02	0.31	0.05	0.104	0.0567979
		Saurata1B048925	transient receptor potential cation channel subfamily A member 1	PM	8.39	3.89	4.87	5.6	4.98	5.546	0.761936
		Saurata1B009204	transient receptor potential cation channel subfamily A member 1-like isoform X1	PM	0.71	0.48	1.05	0.24	1.26	0.748	0.185024
		Saurata1B029372	transient receptor potential cation channel subfamily M member 1	PM	0	0.34	0	0.06	0	0.08	0.0660303
		Saurata1B027705	transient receptor potential cation channel subfamily M member 2	PM	0.13	0.15	0.01	0.17	0.3	0.152	0.0463033
		Saurata1B004049	transient receptor potential cation channel subfamily M member 3	PM	0	0	0	0	0	0	0
		Saurata1B004681	transient receptor potential cation channel subfamily M member 3-like isoform X2	PM	0	0.29	0	0.2	0.33	0.164	0.0701855
		Saurata1B003198	transient receptor potential cation channel subfamily M member 4-like	PM	3.79	1.37	6.28	3.03	16.65	6.224	2.72389
		Saurata1B010587	transient receptor potential cation channel subfamily M member 5	PM	0.07	0.12	0.02	0	0.07	0.056	0.0211187
		Saurata1B019170	transient receptor potential cation channel subfamily M member 6-like	PM	0.05	0.22	0	0.05	0.81	0.226	0.150685
		Saurata1B036651	transient receptor potential cation channel subfamily M member 7 isoform X1	PM	1.81	0.85	1.14	0.53	0.97	1.06	0.212368
		Saurata1B009015	transient receptor potential cation channel subfamily M member 7 isoform X2	PM	0	0	0	0.05	0	0.01	0.01
		Saurata1B001494	transient receptor potential cation channel subfamily V member 1-like	PM	8.02	6.49	7.4	4.82	4.57	6.26	0.684828
		Saurata1B014146	transient receptor potential cation channel subfamily V member 4	PM	0.3	2.8	0.09	2.22	1.35	1.352	0.526758
		Saurata1B003780	transient receptor potential cation channel subfamily V member 6-like	PM	7.55	2.6	5.71	1.16	12.6	5.924	2.0125
Transmembrane channel like	TMC	Saurata1B053741	transmembrane channel 1	PM	0.02	0.29	0.02	0.56	0.34	0.246	0.10284
		Saurata1B016141	transmembrane channel 2	PM	0.1	0.14	0.45	0.4	0.37	0.292	0.0716519
		Saurata1B005313	transmembrane channel 3	PM	0	0	0	0	0	0	0
		Saurata1B006398	transmembrane channel 4	PM	0.23	0.32	0.25	0.19	0.52	0.302	0.0584294
		Saurata1B006961	transmembrane channel 5	PM	0.62	0.82	0.48	0.63	0.29	0.568	0.0880568
		Saurata1B023470	transmembrane channel 6a	PM	10.41	10.59	6.64	2.08	14.81	8.906	2.14108
		Saurata1B044702	transmembrane channel 6b	PM	22.87	9.92	8.27	9.81	11.83	12.54	2.64351
		Saurata1B032512	transmembrane channel 7	PM	29.95	11.13	8.54	11.06	10.47	14.23	3.95785
Two P domain potassium channels	K(2P)	Saurata1B014912	potassium channel subfamily K member 1	PM, endosome	25.86	10.25	9.25	8.54	9.61	12.702	3.30109
		Saurata1B021025	potassium channel subfamily K member 10 isoform X1	PM	0	0.69	0	0.59	0.35	0.326	0.144104
		Saurata1B027770	potassium channel subfamily K member 10-like	PM	0.04	0.19	0	0.04	0.17	0.088	0.0383927
		Saurata1B026708	potassium channel subfamily K member 12	PM	0	0.17	0	0.16	0.48	0.162	0.0876584
		Saurata1B019743	potassium channel subfamily K member 13-like	PM	1.28	1.37	0.35	1.73	2.66	1.478	0.373087
		Saurata1B013806	potassium channel subfamily K member 15-like	PM	0	1.26	0.41	0.14	0.92	0.546	0.237815
		Saurata1B009221	potassium channel subfamily K member 16-like	PM	0	0.93	0	0.67	0.22	0.364	0.187045
		Saurata1B020402	potassium channel subfamily K member 17-like	PM	0	0	0	0	0	0	0
		Saurata1B014226	potassium channel subfamily K member 18	PM	0.56	0.9	0	0.49	0.83	0.556	0.159204
		Saurata1B020217	potassium channel subfamily K member 1-like	PM, endosome	0	0.91	0	0	0.18	0.218	0.176477
		Saurata1B036831	potassium channel subfamily K member 2	PM, ER	0	0	0	0	0	0	0
		Saurata1B041851	potassium channel subfamily K member 2-like	PM, ER	0	0	0	0	0	0	0
		Saurata1B026004	potassium channel subfamily K member 3	PM	0	0.33	0.35	0.63	1.38	0.538	0.232968
		Saurata1B053343	potassium channel subfamily K member 4	PM	0	0.24	0	0.08	0.09	0.082	0.0438634
		Saurata1B021511	potassium channel subfamily K member 5	PM	0.19	3.67	1.87	0.38	10.76	3.374	1.94942
		Saurata1B049257	potassium channel subfamily K member 5-like	PM	1.22	0	0	0.34	0.6	0.432	0.227033
		Saurata1B016210	potassium channel subfamily K member 6-like	PM	15.88	11.16	19.26	5.55	52.81	20.932	8.29645
		Saurata1B008602	potassium channel subfamily K member 9	PM	1.21	0.69	0.94	0.78	1.05	0.934	0.0929839
Two-Pore channels	TPCs	Saurata1B031230	two pore calcium channel 1 isoform X1	Lysosome, endosome	15.23	4.97	8.43	6.92	7.58	8.626	1.74674
		Saurata1B034994	two pore calcium channel 1-like	Lysosome, endosome	73.74	47.06	36.65	40.44	48.28	49.234	6.48796
		Saurata1B014779	two pore calcium channel 2	Lysosome	1.25	4.87	0.79	1.49	0.27	1.734	0.811256
Voltage-dependent anion channels	VDACs	Saurata1B039443	Voltage-dependent anion-selective channel 1	MM	86.15	57.96	75.84	60.85	105.22	77.204	8.67344
		Saurata1B043268	Voltage-dependent anion-selective channel 2	MM	163.85	66.23	78.35	41.31	115.44	93.036	21.3616
		Saurata1B032515	voltage-dependent anion-selective channel 2-like	MM	9.89	4.99	3.65	3.01	4.24	5.156	1.22782
		Saurata1B007962	voltage-dependent anion-selective channel 2-like isoform X2	MM	6.52	4.28	5.44	0.95	5.77	4.592	0.979425
		Saurata1B032288	voltage-dependent anion-selective channel 3 isoform X2	MM	35.41	11.49	11.69	6.87	10.14	15.12	5.14533
Voltage-gated calcium channels	VGCCs	Saurata1B010636	dihydropyridine-sensitive L-type skeletal muscle calcium channel subunit alpha-1-like	PM	0	1.22	0	0.39	0.95	0.512	0.248222
		Saurata1B010515	voltage-dependent calcium channel gamma-1 subunit	PM	0.16	0.27	0	0.31	0.19	0.186	0.0537215
		Saurata1B032473	voltage-dependent calcium channel gamma-1 subunit-like	PM	0	0	0	0	0	0	0
		Saurata1B040236	Voltage-dependent calcium channel gamma-2 subunit	PM	0	0.33	0.28	0	0	0.122	0.0751266
		Saurata1B026072	voltage-dependent calcium channel gamma-2 subunit-like	PM	0	0	0	0	0	0	0
		Saurata1B045468	voltage-dependent calcium channel gamma-3 subunit-like	PM	0	0.6	0.27	0.25	0.14	0.252	0.099368
		Saurata1B032662	voltage-dependent calcium channel gamma-4 subunit	PM	0	0.19	0	0.74	0.49	0.284	0.145003
		Saurata1B009428	voltage-dependent calcium channel gamma-4 subunit-like	PM	0	1.55	0.17	0.18	0.47	0.474	0.279403
		Saurata1B040455	voltage-dependent calcium channel gamma-5 subunit	PM	0	0	0	0	0.13	0.026	0.026
		Saurata1B036600	voltage-dependent calcium channel gamma-5 subunit isoform X1	PM	0	0.16	0	0	0	0.032	0.032
		Saurata1B031106	voltage-dependent calcium channel gamma-6 subunit	PM	0	0.28	0	0	0	0.056	0.056
		Saurata1B047684	voltage-dependent calcium channel gamma-6 subunit-like	PM	0	0	0	0	0	0	0
		Saurata1B051404	voltage-dependent calcium channel gamma-7 subunit-like	PM	0	0	0	0	0.37	0.074	0.074
		Saurata1B026965	voltage-dependent calcium channel subunit alpha-2 delta-1	PM	0.22	0.19	0	0.05	0.1	0.112	0.0414005
		Saurata1B000136	voltage-dependent calcium channel subunit alpha-2 delta-3-like	PM	0	0	0	0	0	0	0
		Saurata1B013425	voltage-dependent L-type calcium channel subunit alpha-1C isoform X5	PM	0.29	0.07	0	0	0.23	0.118	0.0601166
		Saurata1B033046	voltage-dependent L-type calcium channel subunit alpha-1C-like isoform X5	PM	1.2	3.27	2.71	1.62	2.1	2.18	0.370769
		Saurata1B052076	voltage-dependent L-type calcium channel subunit alpha-1D isoform X20	PM	0.05	1.24	0.17	1.03	0.76	0.65	0.233987
		Saurata1B032916	voltage-dependent L-type calcium channel subunit alpha-1D-like	PM	0	5.55	0.2	1.24	0.64	1.526	1.02826
		Saurata1B030476	voltage-dependent L-type calcium channel subunit alpha-1D-like isoform X4	PM	0	0	0.06	0.12	0	0.036	0.024
		Saurata1B014522	voltage-dependent L-type calcium channel subunit alpha-1S	PM	10.17	4.86	3.63	3.32	4.67	5.33	1.24523
		Saurata1B030207	voltage-dependent L-type calcium channel subunit beta-1 isoform X1	PM	0	0.48	0.08	0.14	0.16	0.172	0.081878
		Saurata1B035354	voltage-dependent L-type calcium channel subunit beta-3-like isoform X2	PM	0	0	0.13	0	0	0.026	0.026
		Saurata1B027817	voltage-dependent L-type calcium channel subunit beta-4 isoform X2	PM	0.15	0.67	0.14	1.16	0.02	0.428	0.214602
		Saurata1B023376	voltage-dependent L-type calcium channel subunit beta-4-like isoform X1	PM	0.04	4.26	0.21	0.78	0.46	1.15	0.787426
		Saurata1B053265	voltage-dependent L-type calcium channel subunit beta-4-like isoform X2	PM	0.9	0.9	0.34	0.46	0.84	0.688	0.119599
		Saurata1B042093	voltage-dependent N-type calcium channel subunit alpha-1B-like	PM	0	0.13	0.02	0.14	0.33	0.124	0.0587026
		Saurata1B028294	voltage-dependent N-type calcium channel subunit alpha-1B-like isoform X6	PM	0	0	0	0	0	0	0
		Saurata1B045545	voltage-dependent P/Q-type calcium channel subunit alpha-1A	PM	0	0	0	0	0	0	0
		Saurata1B017054	voltage-dependent P/Q-type calcium channel subunit alpha-1A-like	PM	0	0.05	0	0.02	0	0.014	0.00979796
		Saurata1B039818	voltage-dependent P_Q-type_calcium_channel_subunit_alpha-1A	PM	0	0.02	0.09	0	0.02	0.026	0.0166132
		Saurata1B056141	voltage-dependent R-type calcium channel subunit alpha-1E	PM	0.03	0.21	0.03	0.06	0.16	0.098	0.0367967
		Saurata1B036044	voltage-dependent R-type calcium channel subunit alpha-1E isoform X1	PM	0	0.18	0	0.37	0.18	0.146	0.0689638
		Saurata1B029550	voltage-dependent R-type calcium channel subunit alpha-1E-like isoform X1	PM	0.32	0.32	0.54	0.75	0.51	0.488	0.0800875
		Saurata1B055935	voltage-dependent R-type calcium channel subunit alpha-1E-like isoform X6	PM	0.09	0.37	0.1	0.13	0.14	0.166	0.0518266
		Saurata1B005112	Voltage-dependent T-type calcium channel subunit alpha-1G	PM	0	0.91	0	0.05	0.29	0.25	0.173522
		Saurata1B051713	voltage-dependent T-type calcium channel subunit alpha-1G isoform X2	PM	0	0	0	0.39	0	0.078	0.078
		Saurata1B019237	voltage-dependent T-type calcium channel subunit alpha-1G isoform X6	PM	3.92	1.97	1.78	1.06	2.06	2.158	0.47424
		Saurata1B048055	voltage-dependent T-type calcium channel subunit alpha-1G-like	PM	0.74	0.87	0.76	1.19	0.27	0.766	0.147872
		Saurata1B025662	voltage-dependent T-type calcium channel subunit alpha-1H	PM	0.15	1.53	0.11	0.32	0.27	0.476	0.266263
		Saurata1B001720	voltage-dependent T-type calcium channel subunit alpha-1H isoform X3	PM	0	0.02	0.06	0.05	0.15	0.056	0.025807
		Saurata1B047675	voltage-dependent T-type calcium channel subunit alpha-1H-like	PM	0	0.04	0.09	0.12	0.02	0.054	0.0222711
		Saurata1B000686	voltage-dependent T-type calcium channel subunit alpha-1I	PM	0	0	0	0	0	0	0
		Saurata1B054512	voltage-dependent T-type calcium channel subunit alpha-1I-like	PM	0	0.31	0	0.59	0.23	0.226	0.109936
Voltage-gated potassium channels	VGKCs	Saurata1B036329	endosomal lysomomal potassium channel TMEM175	Lysosome, endosome	12.84	11.16	4.51	4.64	7.85	8.2	1.6838
		Saurata1B001007	potassium voltage-gated channel subfamily A member 10-like	PM	0	0.21	0.05	0.27	0.26	0.158	0.0558032
		Saurata1B002445	potassium voltage-gated channel subfamily A member 1-like	PM	0.02	0.8	0.34	0.21	0.43	0.36	0.129808
		Saurata1B024871	potassium voltage-gated channel subfamily A member 2	PM	0.18	0.28	0	0.49	0.21	0.232	0.0793347
		Saurata1B037594	potassium voltage-gated channel subfamily A member 2-like	PM	0	0.23	0.03	0.41	0.37	0.208	0.0844038
		Saurata1B055079	potassium voltage-gated channel subfamily A member 3-like	PM	0	0.89	0.06	0	0.29	0.248	0.169157
		Saurata1B008876	potassium voltage-gated channel subfamily A member 4	PM	0	0.3	0	0.13	0.26	0.138	0.0629603
		Saurata1B042240	potassium voltage-gated channel subfamily A member 7-like	PM	0	0.09	0.44	0.28	0.66	0.294	0.119063
		Saurata1B048970	potassium voltage-gated channel subfamily B member 1-like	PM	0.21	2.57	1.23	1.69	1.29	1.398	0.38145
		Saurata1B012209	potassium voltage-gated channel subfamily B member 2	PM	0	0.45	0.05	0.05	0.4	0.19	0.0966954
		Saurata1B023116	potassium voltage-gated channel subfamily C member 1 isoform X1	PM	0	0.54	0.26	0.46	0.82	0.416	0.137463
		Saurata1B017059	potassium voltage-gated channel subfamily C member 1-like isoform X1	PM	0.04	0.41	0.12	0.28	0.29	0.228	0.0658331
		Saurata1B007709	potassium voltage-gated channel subfamily C member 1-like isoform X2	PM	1.29	0.95	1.03	0.92	2.23	1.284	0.245308
		Saurata1B013818	potassium voltage-gated channel subfamily C member 2 isoform X1	PM	0	2.63	0.06	0.58	1.38	0.93	0.491772
		Saurata1B018698	potassium voltage-gated channel subfamily C member 2 isoform X2	PM	0	0.89	0	0.26	0.21	0.272	0.163383
		Saurata1B028724	potassium voltage-gated channel subfamily C member 4	PM	4.59	4.81	1.52	3.22	2.41	3.31	0.628912
		Saurata1B000510	potassium voltage-gated channel subfamily D member 1	PM	0	0.72	0	4.61	0	1.066	0.896904
		Saurata1B024960	potassium voltage-gated channel subfamily D member 2-like isoform X1	PM	0.05	0.91	0.63	0.42	0.58	0.518	0.141188
		Saurata1B036512	potassium voltage-gated channel subfamily D member 3-like	PM	0.05	6.41	0.17	0.69	1.38	1.74	1.19084
		Saurata1B023113	potassium voltage-gated channel subfamily E member 1-like	PM	0	0.8	0	0	1.89	0.538	0.371812
		Saurata1B002869	potassium voltage-gated channel subfamily E member 2-like	PM	5.33	5.2	0	0	0	2.106	1.28982
		Saurata1B010955	potassium voltage-gated channel subfamily F member 1	PM	0	1.24	0.19	0.28	0.53	0.448	0.215578
		Saurata1B017474	potassium voltage-gated channel subfamily G member 2-like	PM	0	0.37	0.13	0.23	0.69	0.284	0.11822
		Saurata1B020455	potassium voltage-gated channel subfamily G member 3-like	PM	0.37	0.93	0.45	0.25	1.23	0.646	0.186161
		Saurata1B032758	potassium voltage-gated channel subfamily G member 3-like	PM	0	0.7	0	0.32	0.6	0.324	0.146205
		Saurata1B017289	potassium voltage-gated channel subfamily G member 4	PM	2.01	2.89	1.41	1.87	1.97	2.03	0.240167
		Saurata1B031270	potassium voltage-gated channel subfamily G member 4-like	PM	0	0.41	0.05	0.12	0.29	0.174	0.0767203
		Saurata1B048666	potassium voltage-gated channel subfamily H member 1 isoform X1	PM	0.6	0.56	0.86	0.84	0.96	0.764	0.0780769
		Saurata1B027133	potassium voltage-gated channel subfamily H member 1-like	PM	9.87	8.41	7.04	3.48	7.47	7.254	1.06102
		Saurata1B020239	potassium voltage-gated channel subfamily H member 2-like	PM	0	0	0	0	0	0	0
		Saurata1B002717	potassium voltage-gated channel subfamily H member 3-like	PM	0.39	0.08	0.26	0.08	0.82	0.326	0.13666
		Saurata1B035444	potassium voltage-gated channel subfamily H member 4-like	PM	0.15	1.78	0.09	1.08	1.48	0.916	0.343549
		Saurata1B018993	potassium voltage-gated channel subfamily H member 5	PM	0.11	1.88	0.52	0.55	0.64	0.74	0.299249
		Saurata1B055463	potassium voltage-gated channel subfamily H member 5-like	PM	0	0	0	0	0	0	0
		Saurata1B051896	potassium voltage-gated channel subfamily H member 6	PM	0.05	0.23	0.02	0.02	0.24	0.112	0.0505371
		Saurata1B002081	potassium voltage-gated channel subfamily H member 6-like	PM	3.21	1.66	1.3	0.34	2.09	1.72	0.471243
		Saurata1B046047	potassium voltage-gated channel subfamily H member 7	PM	0.14	0.09	0.46	1.4	0.16	0.45	0.246211
		Saurata1B029316	potassium voltage-gated channel subfamily H member 7-like isoform X3	PM	0	0.16	0.37	0.04	0.81	0.276	0.148209
		Saurata1B034878	potassium voltage-gated channel subfamily H member 8	PM	0.02	0.33	0	0.08	0.11	0.108	0.0589406
		Saurata1B043053	potassium voltage-gated channel subfamily H member 8-like	PM	0.03	0.11	0.04	0.2	0.12	0.1	0.0308221
		Saurata1B037224	potassium voltage-gated channel subfamily KQT member 1-like	PM	0.84	0.35	0.98	1.55	0.7	0.884	0.196688
		Saurata1B022895	potassium voltage-gated channel subfamily KQT member 2-like isoform X1	PM	0.58	0.44	0.71	1.21	2.9	1.168	0.452055
		Saurata1B039729	potassium voltage-gated channel subfamily KQT member 2-like isoform X4	PM	0.04	0.53	0.06	0.48	0.32	0.286	0.10245
		Saurata1B003346	potassium voltage-gated channel subfamily KQT member 3	PM	0	0.21	0	0.36	0.16	0.146	0.0680882
		Saurata1B009012	potassium voltage-gated channel subfamily KQT member 4 isoform X1	PM	9.69	5.29	2.19	0.91	2	4.016	1.59473
		Saurata1B009668	potassium voltage-gated channel subfamily KQT member 5-like	PM	0	0	0.23	0.41	0	0.128	0.0833906
		Saurata1B043670	potassium voltage-gated channel subfamily KQT member 5-like isoform X4	PM	0.09	0.16	0.09	0.12	0.29	0.15	0.0372827
		Saurata1B052805	potassium voltage-gated channel subfamily S member 2	PM	0	1.86	0	0.91	0.71	0.696	0.344218
		Saurata1B045544	potassium voltage-gated channel subfamily S member 2-like	PM	0	0.11	0.79	0.33	0.28	0.302	0.135551
		Saurata1B013920	potassium voltage-gated channel subfamily S member 3	PM	0	0.39	0	0.58	0.61	0.316	0.13441
		Saurata1B046001	potassium voltage-gated channel subfamily S member 3-like	PM	0	1.35	0	1.1	0.12	0.514	0.293762
		Saurata1B036624	potassium voltage-gated channel subfamily V member 1	PM	0.65	0.27	0.42	0.08	0.53	0.39	0.0996494
		Saurata1B026216	potassium voltage-gated channel subfamily V member 2	PM	0	0.95	0	1.17	0.22	0.468	0.247455
		Saurata1B003265	potassium voltage-gated channel subfamily V member 2-like	PM	0	1.37	0	0	1.06	0.486	0.301622
		Saurata1B001836	Potassium_voltage-gated_channel_subfamily_H_member_5	PM	0	0	0	0	0	0	0
		Saurata1B034156	Potassium_voltage-gated_channel_subfamily_V_member_2	PM	0	0	0	0	0	0	0
		Saurata1B048290	voltage-gated potassium channel subunit beta-1 isoform X1	PM	0	0	0	0	2.11	0.422	0.422
		Saurata1B019061	voltage-gated potassium channel subunit beta-1 isoform X3	PM	0	0.21	0.09	0.08	0.14	0.104	0.0347275
		Saurata1B025962	voltage-gated potassium channel subunit beta-1-like isoform X2	PM	0	0.09	0.33	0	0	0.084	0.0639218
		Saurata1B013510	voltage-gated potassium channel subunit beta-2 isoform X1	PM	0	0.92	0	0	0.35	0.254	0.179767
		Saurata1B047199	voltage-gated potassium channel subunit beta-2 isoform X2	PM	9.61	6.46	6.51	4.87	6.49	6.788	0.771883
		Saurata1B004872	voltage-gated potassium channel subunit beta-2-like	PM	0	0.98	0	0	0.78	0.352	0.217862
		Saurata1B004124	voltage-gated potassium channel subunit beta-3-like isoform X1	PM	0.07	0.04	0.15	0	0.08	0.068	0.024779
Voltage-gated proton channel	VGPC	Saurata1B025865	voltage-gated hydrogen channel 1	PM	40.37	34	23.24	19.44	28.64	29.138	3.73418
Voltage-gated sodium channels	VGSC	Saurata1B044092	sodium channel subunit beta-1	PM	4.58	3.25	3.59	2.46	4.33	3.642	0.381227
		Saurata1B005561	sodium channel subunit beta-1-like	PM	0.52	0.45	0.31	0.59	1.58	0.69	0.227266
		Saurata1B019004	sodium channel subunit beta-2	PM	0	0	0	0	0	0	0
		Saurata1B001438	sodium channel subunit beta-3 isoform X1	PM	0	0.15	0	0	0.45	0.12	0.0874643
		Saurata1B038863	sodium channel subunit beta-4	PM	0	0.4	0	0	0.93	0.266	0.183183
		Saurata1B044985	sodium channel type 2 subunit alpha-like isoform X1	PM	0.01	0.81	0.08	0.09	0.36	0.27	0.147614
		Saurata1B055126	sodium channel type 2 subunit alpha-like isoform X2	PM	0	0.2	0	0.03	0.04	0.054	0.0373631
		Saurata1B010380	sodium channel type 3 subunit alpha-like	PM	0	0	0	0	0	0	0
		Saurata1B007353	sodium channel type 4 subunit alpha A-like	PM	0.02	0.49	0.05	0.21	0.23	0.2	0.083666
		Saurata1B021032	sodium channel type 4 subunit alpha B-like	PM	0	0	0	0	7.72	1.544	1.544
		Saurata1B007766	sodium channel type 4 subunit alpha-like	PM	0	0	0	0.36	0.14	0.1	0.0704273
		Saurata1B000585	sodium channel type 4 subunit alpha-like isoform X1	PM	0	0	0	0	0	0	0
		Saurata1B048000	sodium channel type 5 subunit alpha-like	PM	0	0.42	0	1.63	1.02	0.614	0.315335
		Saurata1B019808	sodium channel type 8 subunit alpha-like isoform X1	PM	0.11	0.82	0.81	0.51	0.93	0.636	0.148849
Volume regulated chloride channels	VRACs	Saurata1B057033	volume-regulated anion channel subunit LRRC8A	PM	11.21	9.72	4.87	5.84	7.22	7.772	1.18477
		Saurata1B000627	volume-regulated anion channel subunit LRRC8D	PM	29.06	19.64	9.59	16.28	11.61	17.236	3.43957
		Saurata1B011842	volume-regulated anion channel subunit LRRC8D-like	PM	0	0.68	0.31	0.13	0.28	0.28	0.114412
		Saurata1B051069	volume-regulated anion channel subunit LRRC8C-like	PM	2.48	1.66	1.16	0.67	0.6	1.314	0.348391
V-type ATPases	V-ATPase	Saurata1B011896	V-type proton ATPase 116 kDa subunit a	Vacuoles	14.46	6.09	5.18	7.76	8.26	8.35	1.6255
		Saurata1B000204	V-type proton ATPase 116 kDa subunit a-like	Vacuoles	108.47	50.12	40.93	46.4	51.69	59.522	12.3764
		Saurata1B011607	V-type proton ATPase 16 kDa proteolipid subunit	Vacuoles	278.1	151.65	140.43	135.38	166.28	174.368	26.4705
		Saurata1B039781	V-type proton ATPase catalytic subunit A	Vacuoles	89.37	41.59	45.3	66.04	51.36	58.732	8.71983
		Saurata1B023354	V-type proton ATPase catalytic subunit A-like	Vacuoles	43.76	31.68	24.08	20.61	34.2	30.866	4.05752
		Saurata1B004579	V-type proton ATPase subunit B, brain isoform	Vacuoles	96.19	37.62	32.36	36.19	36.77	47.826	12.1245
		Saurata1B050766	V-type proton ATPase subunit B, brain isoform-like	Vacuoles	0	0	0.1	0	0.05	0.03	0.02
		Saurata1B006675	V-type proton ATPase subunit C 1	Vacuoles	59.64	32.43	33.12	27.04	40.93	38.632	5.70017
		Saurata1B029649	V-type proton ATPase subunit C 1-A	Vacuoles	33.78	22	14.09	9.21	20.28	19.872	4.15474
		Saurata1B055075	V-type proton ATPase subunit C 1-B-like	Vacuoles	0	0	0	0	0	0	0
		Saurata1B038802	V-type proton ATPase subunit D	Vacuoles	73.51	40.37	28.68	32.22	38.36	42.628	7.99964
		Saurata1B005169	V-type proton ATPase subunit D 1-like	Vacuoles	0.09	0	0	0	0.67	0.152	0.130668
		Saurata1B034696	V-type proton ATPase subunit E 1	Vacuoles	309.08	167.33	151.26	132.22	194.8	190.938	31.2665
		Saurata1B026157	V-type proton ATPase subunit E 1-like	Vacuoles	146.76	71.45	74.41	73.09	99.33	93.008	14.3816
		Saurata1B029374	V-type proton ATPase subunit E 2-like	Vacuoles	0	0	0	0	0	0	0
		Saurata1B056857	V-type proton ATPase subunit G 1-like	Vacuoles	113.65	40.9	44.76	39.42	56.3	59.006	13.978
		Saurata1B008763	V-type proton ATPase subunit H	Vacuoles	78.91	44.42	35.1	32.96	47.06	47.69	8.25003
Calcium channel flower	Ca2+ channel flower	Saurata1B016322	calcium channel flower homolog isoform X1	Vacuoles	6.05	2.8	4.49	2.64	5.96	4.388	0.735564
Calcium permeable stress-gated cation channel	CSC	Saurata1B019637	CSC1	PM	0.09	0.11	0	0	0	0.04	0.0246982
		Saurata1B006768	CSC1-like protein 2	PM	3.88	1.84	1.19	2.42	1.37	2.14	0.484324
		Saurata1B016301	CSC1-like protein 2	PM	0.24	0.75	0.36	0.42	0.45	0.444	0.084534
		Saurata1B029254	CSC1-like protein 1	PM	42.47	16.09	15.22	23.26	14.89	22.386	5.2503
Cation/proton exchangers	CAX	Saurata1B034452	Putative cation exchanger C521.04c transcript variant X2	Vacuoles	0	0.42	14.37	0.45	45.39	12.126	8.75194
Monovalent cation/proton antiporter	CPA	Saurata1B014261	Low affinity vacuolar monovalent cation/H(+) antiporter-like	Vacuoles	117.71	61.22	53.02	40.51	66.5	67.792	13.2272
(1) PM = plasma membrane; NM = nuclear membrane; MM = mitochondrial membrane; ER = endoplasmic reticulum.
