# Supplementary material for: Role of Ion Channels in the Maintenance of Sperm Motility and Swimming Behavior in a Marine Teleost
Source: Int J Mol Sci. 2022 Oct 11;23(20):12113. doi: 10.3390/ijms232012113 (PMC9603624; doi:10.3390/ijms232012113)
Supplement: Supplementary file 1 [file ijms-23-12113-s001.zip › Spreadsheet S2.xlsx]

## Sheet: Spreadsheet S2
Plasma membrane ion channels highly expressed in seabream ejaculated spermatozoa
				FPKM in each RNA-seq library
FAMILY	ID	GENE		AD3915	AD3919	AD3920	AD3921	AD3924
Acid-sensing ion channels (ASICs)	Saurata1B052394	acid-sensing ion channel 2 isoform X1	asic_x1	6.92	3.6	3.4	4.06	2.67
Calcium- and sodium-activated potassium channels	Saurata1B055091	small conductance calcium-activated potassium channel 1-like	kcnn1	0.59	2.17	3.65	0.79	6.5
Chloride intracellular channels (CLIC)	Saurata1B034424	chloride intracellular channel 1	clic1	49.33	19.97	15.88	18.3	15.63
	Saurata1B029277	chloride intracellular channel protein 4	clic4	49.34	24.66	25.67	19.61	28.76
ClC family channels	Saurata1B012747	H(+) Cl(-) exchange transporter 7 isoform X1	clcn7_x1	25.79	10.97	7.41	6.32	12.46
Cyclic nucleotide-regulated channels	Saurata1B017890	cyclic nucleotide-gated cation channel beta-3-like	cngb3	0	6.45	0	0	0
	Saurata1B055687	potassium sodium hyperpolarization-activated cyclic nucleotide-gated channel 2-like	hcn2	0.37	1.57	1.27	0.82	1.56
Cyclin and CBS domain divalent metal cation transport mediators	Saurata1B044515	metal transporter CNNM2	cnnm2	21.57	10.51	7.36	4.39	7.86
Inward rectifier potassium channels	Saurata1B028622	ATP-sensitive inward rectifier potassium channel 8	kcnj8	12.39	4.84	0.81	0.4	0.92
	Saurata1B015655	G -activated inward rectifier potassium channel 4	kcnj4	9.29	6.17	3.04	3.88	3.81
Piezo channels	Saurata1B009589	piezo-type mechanosensitive ion channel component 1	piezo1	8.55	7.46	6.94	2.42	2.87
P-type ATPases	Saurata1B014981	sodium potassium-transporting ATPase subunit beta-1	atp1b1	277.42	142.14	107.75	91.49	120.81
SLC20 family of sodium-dependent phosphate transporters	Saurata1B018145	sodium-dependent phosphate transporter 1-B-like	slc20a1b	20.06	13.8	10.13	15.03	18.18
SLC24 family of sodium/potassium/calcium exchangers	Saurata1B033916	sodium potassium calcium exchanger 2-like	slc24A2	0	0.85	50.73	0.02	139.39
SLC4 family of bicarbonate transporters	Saurata1B030325	anion exchange 3-like isoform X2	slc4A3_x2	6.99	5.56	13.98	15.46	8.54
	Saurata1B017597	sodium bicarbonate transporter 11 isoform X2	slc4A11_x2	20.38	10.29	13.56	11.77	12.43
SLC58 MagT-like magnesium transporter family	Saurata1B038883	magnesium transporter 1	magt1	85.78	32.96	38.42	26.49	58.67
SLC8 family of sodium/calcium exchangers	Saurata1B038442	sodium calcium exchanger 1 isoform X1	slc8a1_x1	13.41	3.07	2.77	4.49	5.25
SLC9 family of sodium/hydrogen exchangers	Saurata1B019112	Na(+) H(+) exchanger beta-like isoform X1	slc9b_x1	12.82	8.39	4.18	5.39	5.97
Transient Receptor Potential channels	Saurata1B048925	transient receptor potential cation channel subfamily A member 1	trpa1	8.39	3.89	4.87	5.6	4.98
	Saurata1B003198	transient receptor potential cation channel subfamily M member 4-like	trpm4	3.79	1.37	6.28	3.03	16.65
	Saurata1B001494	transient receptor potential cation channel subfamily V member 1-like	trpv1	8.02	6.49	7.4	4.82	4.57
	Saurata1B014146	transient receptor potential cation channel subfamily V member 4	trpv4	0.3	2.8	0.09	2.22	1.35
	Saurata1B003780	transient receptor potential cation channel subfamily V member 6-like	trpv6	7.55	2.6	5.71	1.16	12.6
Transmembrane channel like family (TMC)	Saurata1B023470	transmembrane channel 6a	tmc6a	10.41	10.59	6.64	2.08	14.81
	Saurata1B044702	transmembrane channel 6b	tmc6b	22.87	9.92	8.27	9.81	11.83
	Saurata1B032512	transmembrane channel 7	tmc7	29.95	11.13	8.54	11.06	10.47
Two P domain potassium channels	Saurata1B014912	potassium channel subfamily K member 1	kcnk1	25.86	10.25	9.25	8.54	9.61
	Saurata1B016210	potassium channel subfamily K member 6-like	kcnk6	15.88	11.16	19.26	5.55	52.81
Voltage-gated calcium channels	Saurata1B033046	voltage-dependent L-type calcium channel subunit alpha-1C-like isoform X5	cacna1c_x5	1.2	3.27	2.71	1.62	2.1
	Saurata1B032916	voltage-dependent L-type calcium channel subunit alpha-1D-like	cacna1d	0	5.55	0.2	1.24	0.64
	Saurata1B019237	voltage-dependent T-type calcium channel subunit alpha-1G isoform X6	cacna1g_x6	3.92	1.97	1.78	1.06	2.06
Voltage-gated potassium channels	Saurata1B028724	potassium voltage-gated channel subfamily C member 4	kcnc4	4.59	4.81	1.52	3.22	2.41
	Saurata1B036512	potassium voltage-gated channel subfamily D member 3-like	kcnd3	0.05	6.41	0.17	0.69	1.38
	Saurata1B002869	potassium voltage-gated channel subfamily E member 2-like	kcne2	5.33	5.2	0	0	0
	Saurata1B017289	potassium voltage-gated channel subfamily G member 4	kcng4	2.01	2.89	1.41	1.87	1.97
	Saurata1B002081	potassium voltage-gated channel subfamily H member 6-like	kcnh6	3.21	1.66	1.3	0.34	2.09
	Saurata1B009012	potassium voltage-gated channel subfamily KQT member 4 isoform X1	kcnq4_x1	9.69	5.29	2.19	0.91	2
	Saurata1B047199	voltage-gated potassium channel subunit beta-2 isoform X2	kcnab2_x2	9.61	6.46	6.51	4.87	6.49
Voltage-gated sodium channels	Saurata1B044092	sodium channel subunit beta-1	scn1b	4.58	3.25	3.59	2.46	4.33
Volume regulated chloride channels	Saurata1B057033	volume-regulated anion channel subunit LRRC8A	lrrc8aa	11.21	9.72	4.87	5.84	7.22
	Saurata1B048067	volume-regulated anion channel subunit LRRC8A	lrrc8ab	2.92	5.22	1.62	2.65	3.3
	Saurata1B000627	volume-regulated anion channel subunit LRRC8D	lrrc8d	34.4	23.06	11.6	18.1	17.45
Calcium permeable stress-gated cation channel	Saurata1B006768	Calcium permeable stress-gated cation channel 1-like protein 2	csc1L2	3.88	1.84	1.19	2.42	1.37
	Saurata1B029254	Calcium permeable stress-gated cation channel 1-like protein 1	csc1L1	42.47	16.09	15.22	23.26	14.89
